# Supplementary material
Source: ML conference proceedings conference paper supplement (https://openreview.net/forum?id=2zWIy5oSCb)
Supplement: supplementary_material [file attachment]

Case #FLARETs\_0038 (slice #172)

90.09

90.12

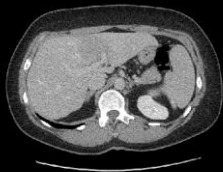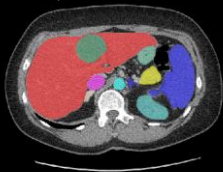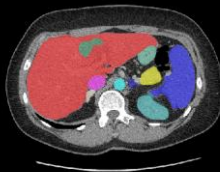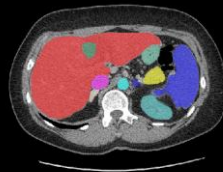

Case #FLARETs\_0053 (slice #72)

89.65

89.83

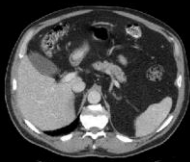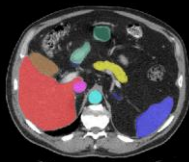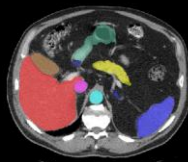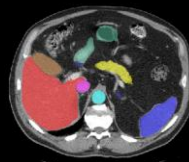

Case #FLARETs\_0093 (slice #58)

70.48

76.94

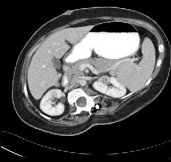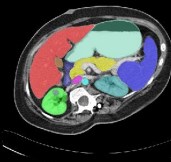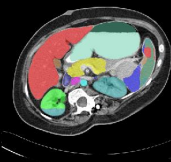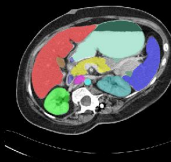

Case #FLARETs\_0033 (slice #74)

83.13

74.73

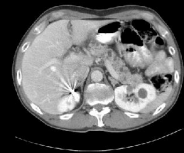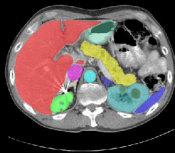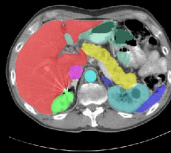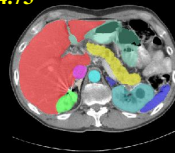

Intensity image

Ground truth

PWS-Seg( $\mathcal{P}$ )

PWS-Seg( $\mathcal{P} + \mathcal{U}$ )

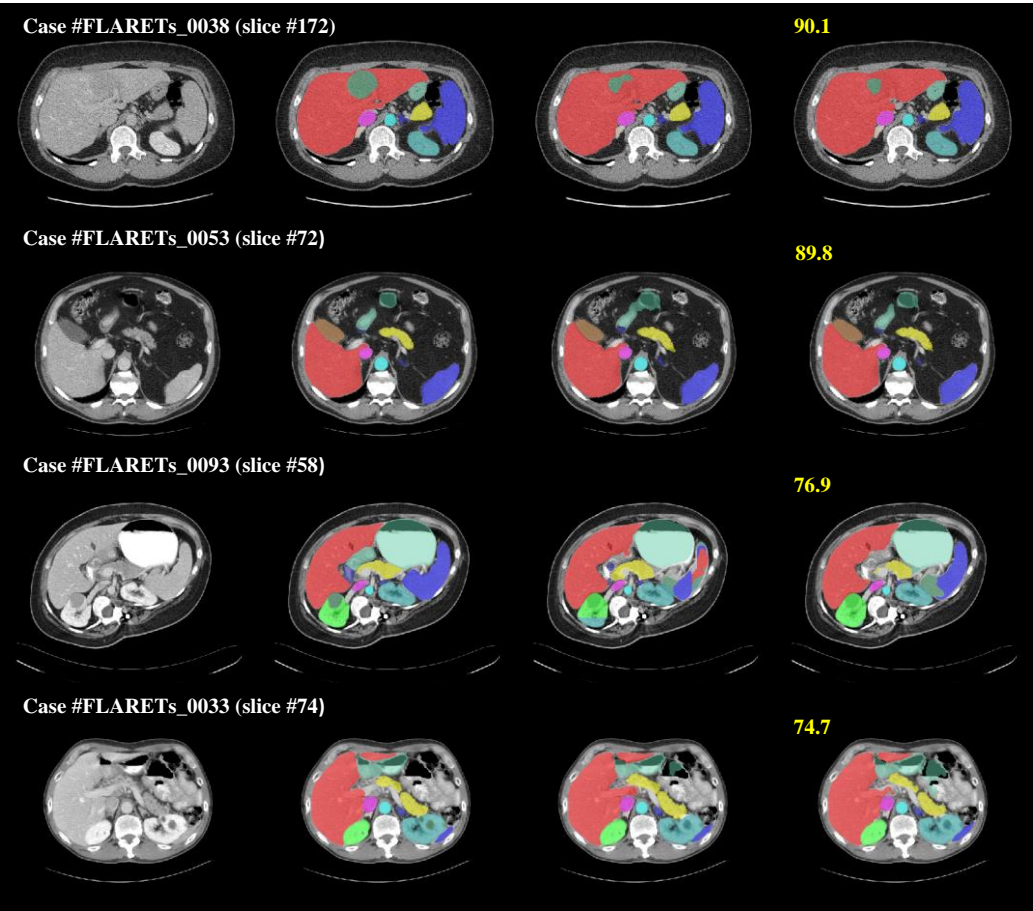

Intensity  
image

Ground truth

PLS-Seg( $\mathcal{L}$ )

PLS-Seg ( $\mathcal{L} +$   
 $\mathcal{U}$ )

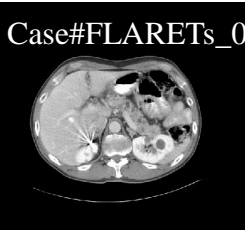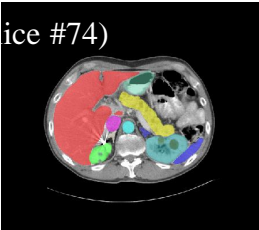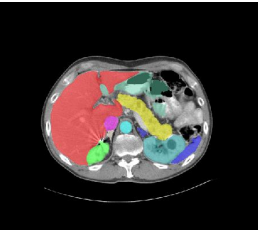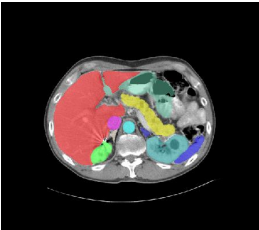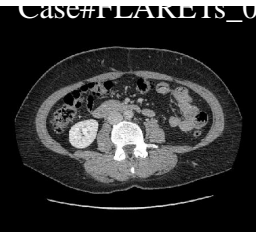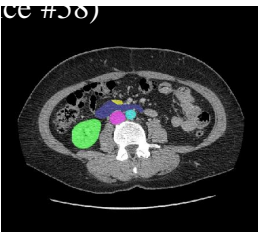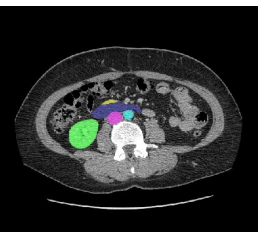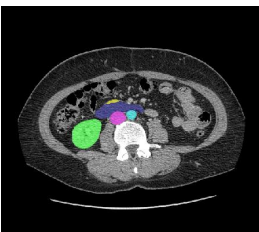

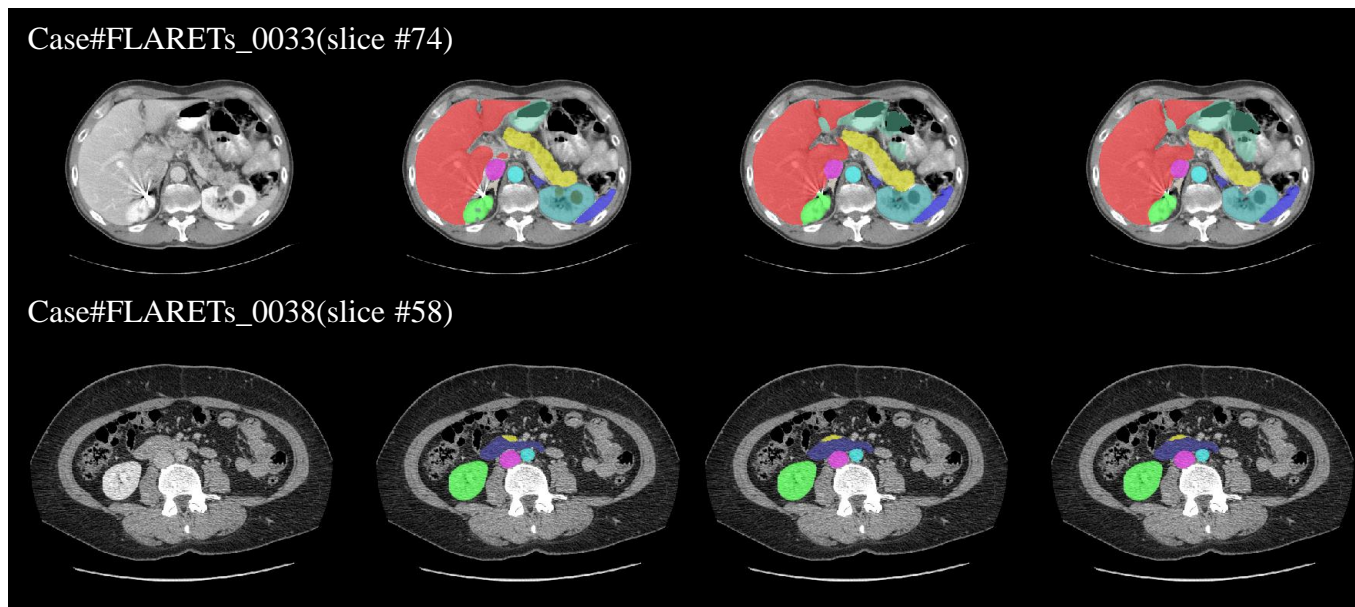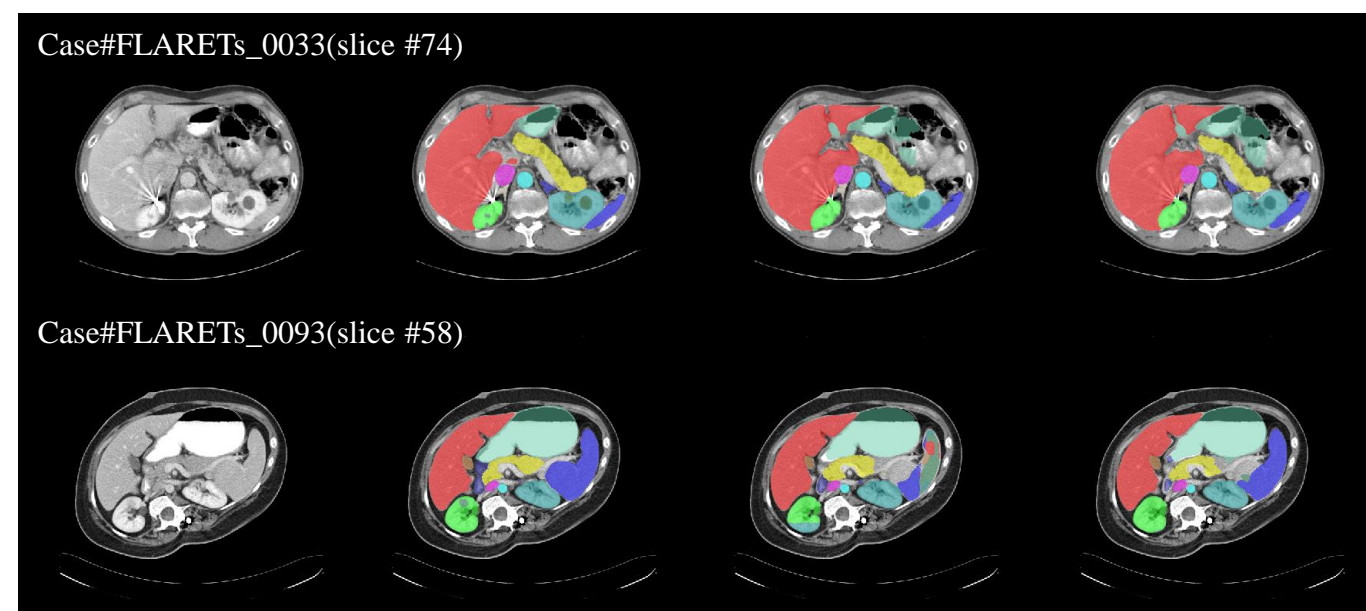

### Stage 1: Multi-organ segmentation

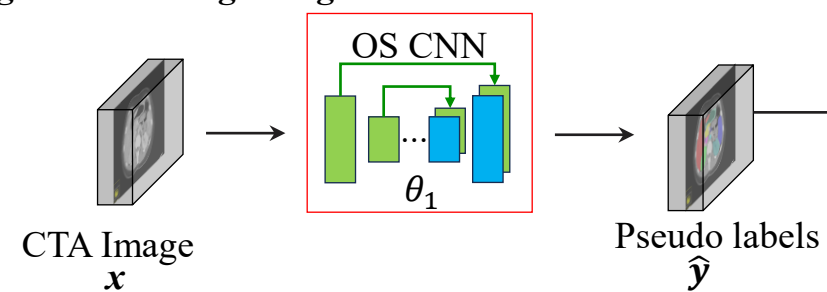

### Stage 2: Organ and tumor segmentation

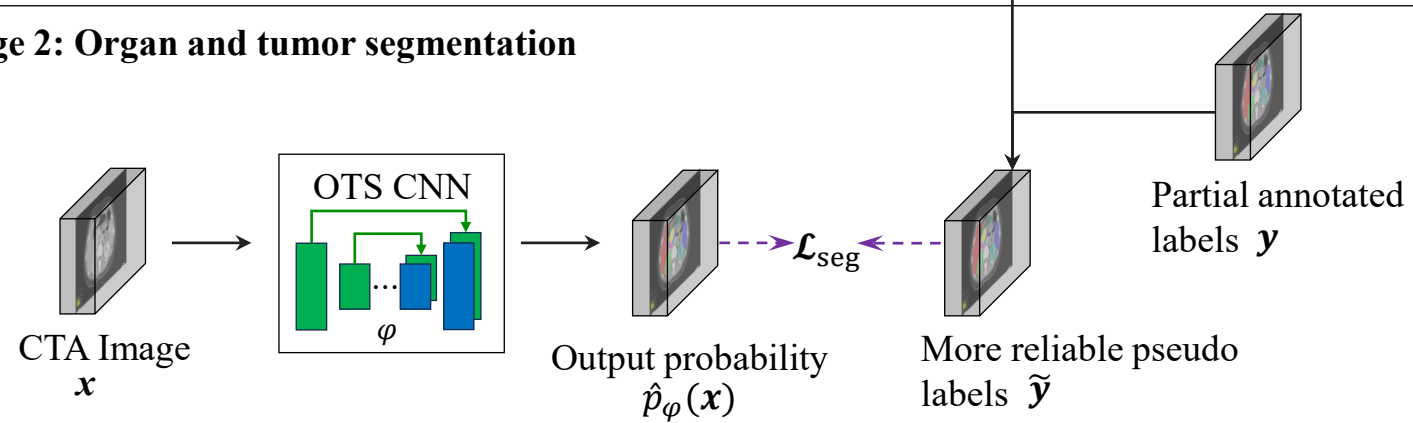

# Our proposed method

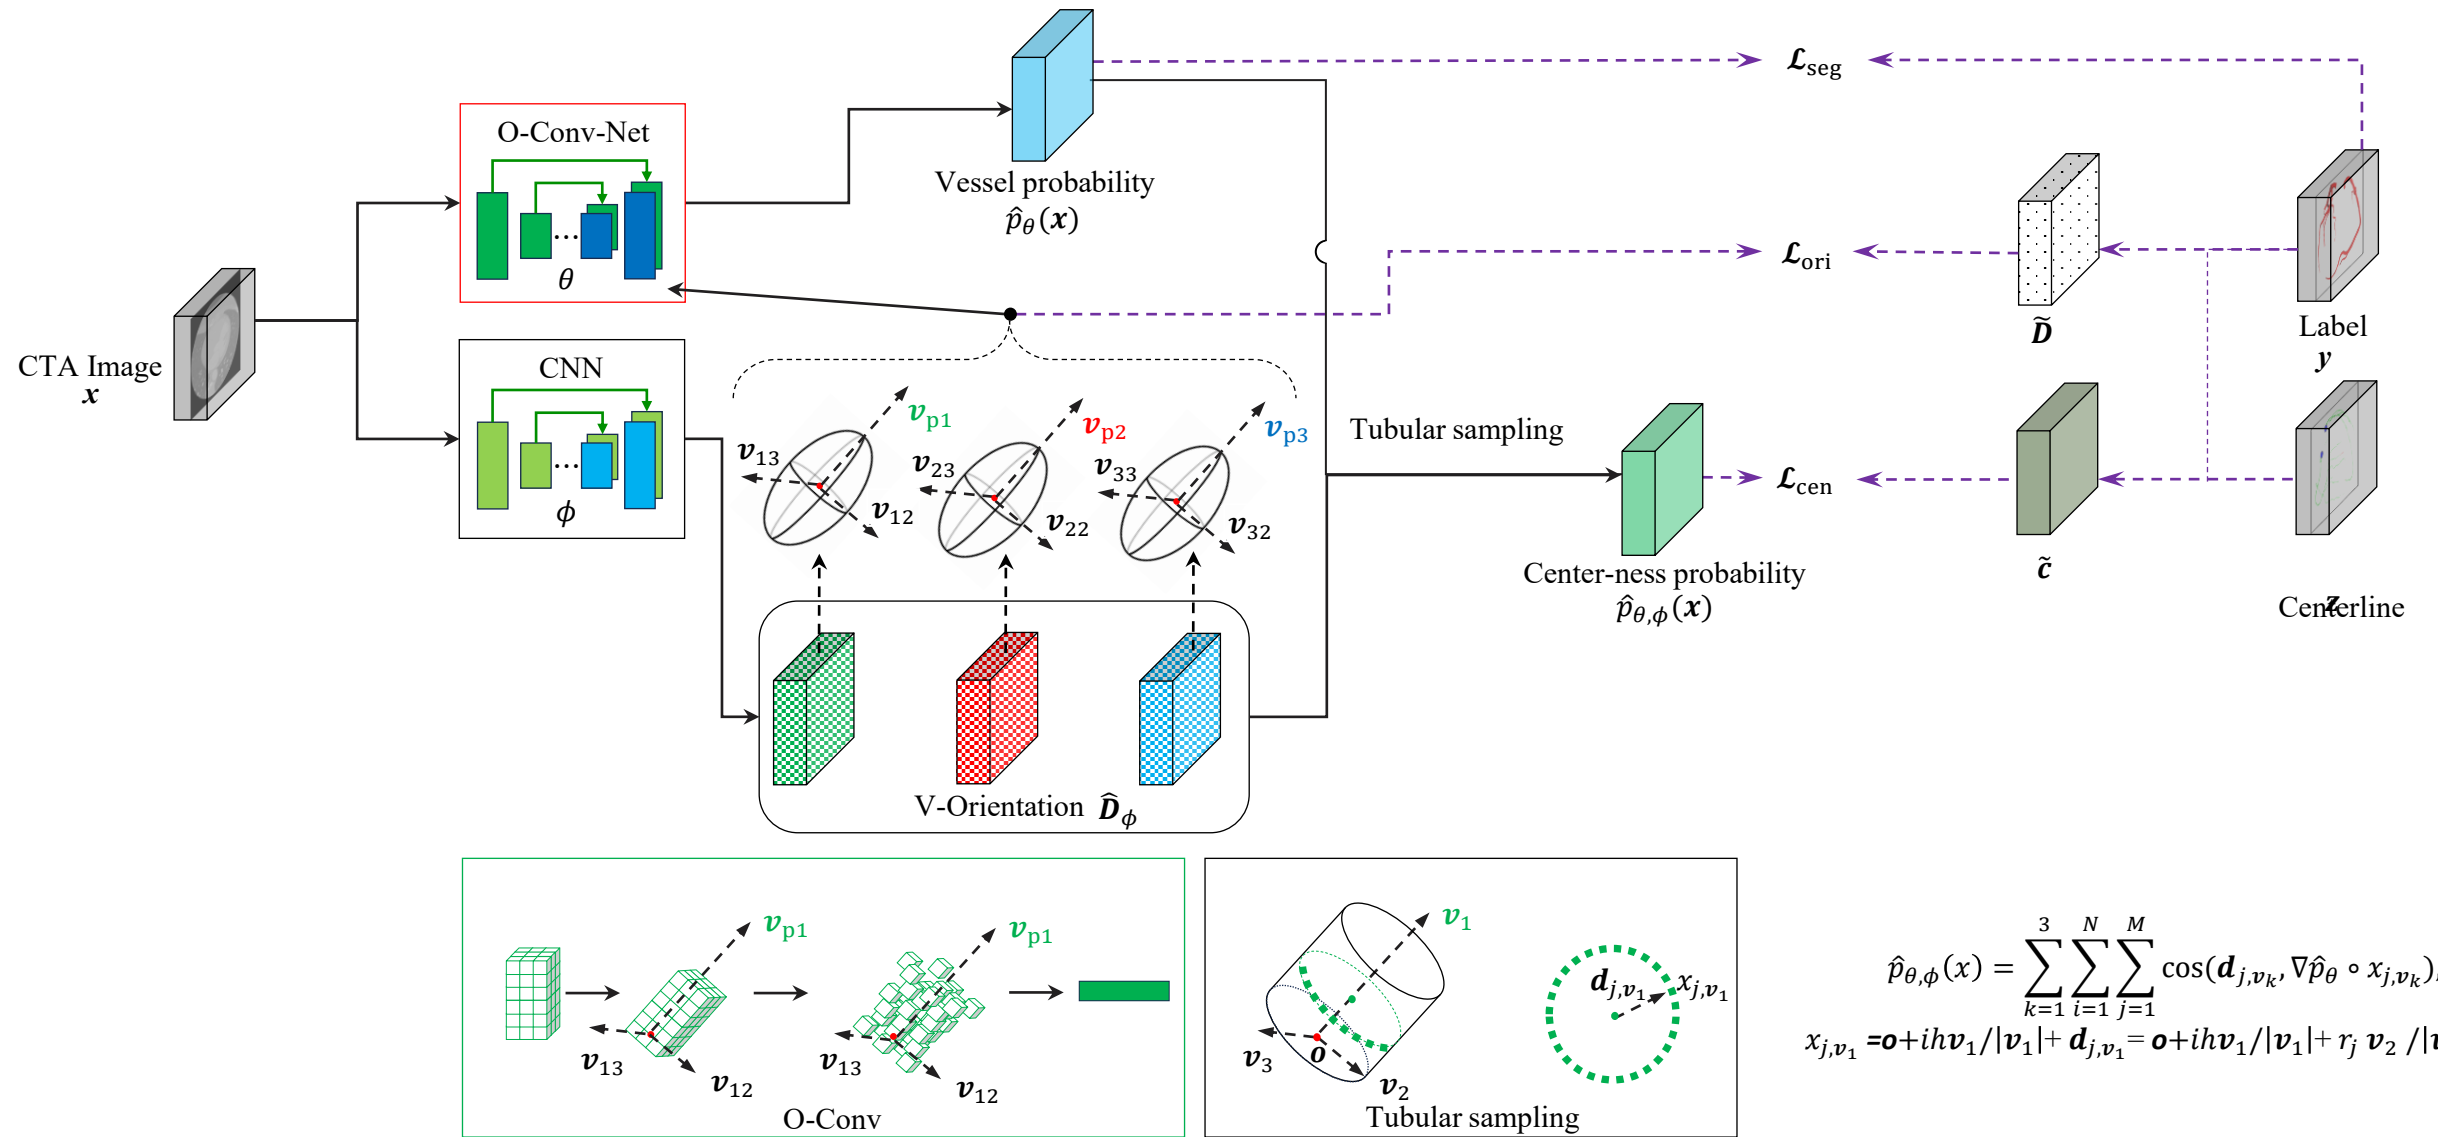

$$\hat{p}_{\theta,\phi}(x) = \sum_{k=1}^3 \sum_{i=1}^N \sum_{j=1}^M \cos(\mathbf{d}_{j,v_k}, \nabla \hat{p}_\theta \circ x_{j,v_k}),$$

$$x_{j,v_1} = \mathbf{o} + i h \mathbf{v}_1 / |\mathbf{v}_1| + \mathbf{d}_{j,v_1} = \mathbf{o} + i h \mathbf{v}_1 / |\mathbf{v}_1| + r_j \mathbf{v}_2 / |\mathbf{v}_2|.$$
