# Supplementary material
Source: ML conference proceedings conference paper supplement (https://openreview.net/forum?id=2zWIy5oSCb)

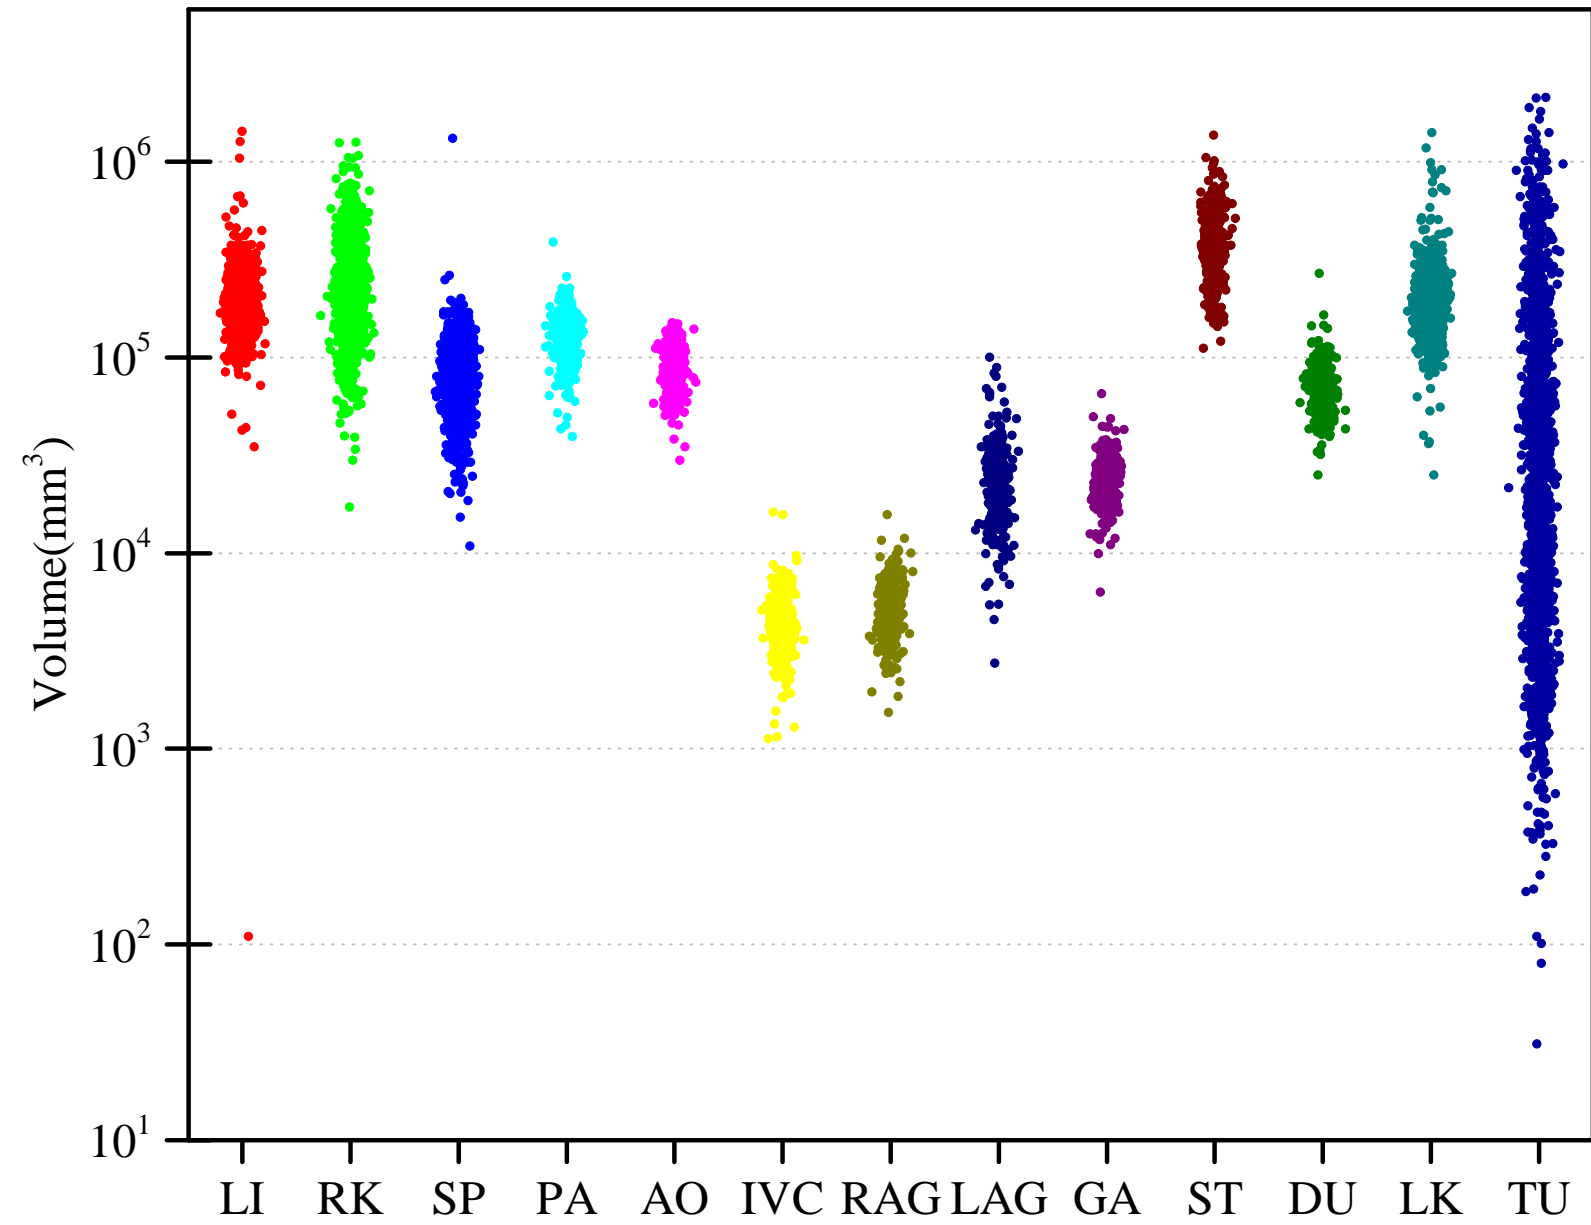

Supplement: supplementary_material [file attachment]

## Stage 1: Multi-organ segmentation

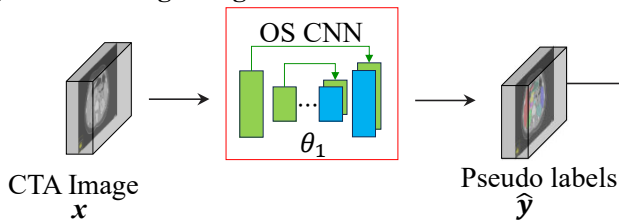

## Stage 2: Organ and tumor segmentation

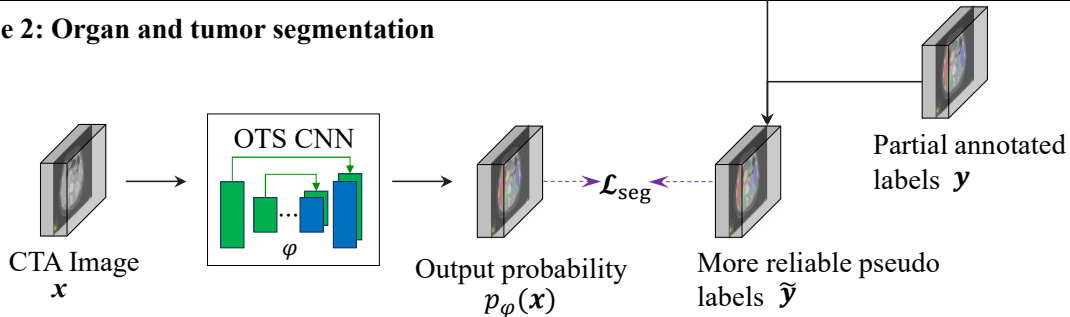

Supplement: supplementary_material [file attachment]
